## RESEARCH ARTICLE

# Diel cycling hypoxia enhances hypoxia tolerance in rainbow trout (*Oncorhynchus mykiss*): evidence of physiological and metabolic plasticity

Kenneth J. Williams<sup>1</sup>, Alicia A. Cassidy<sup>2</sup>, Christine E. Verhille<sup>3</sup>, Simon G. Lamarre<sup>2</sup> and Tyson J. MacCormack<sup>1,\*</sup>

## ABSTRACT

Many fish naturally encounter a daily cycle of hypoxia, but it is unclear whether this exposure hardens hypoxia-intolerant fish to future hypoxia or leads to accumulated stress and death. The rainbow trout (*Oncorhynchus mykiss*) is a putatively hypoxia-sensitive species found in rivers and estuaries that may routinely experience hypoxic events. Trout were exposed to one of four 135 h treatments in a swim-tunnel respirometer: (1) air-saturated control (20.7 kPa  $P_{O_2}$ ); (2) diel cycling  $O_2$  (20.7–4.2 kPa  $P_{O_2}$  over 24 h); (3) acute hypoxia (130 h at 20.7 kPa  $P_{O_2}$  followed by 5 h at 4.2 kPa  $P_{O_2}$ ); and (4) the mean oxygen tension (12.4 kPa  $P_{O_2}$ ) experienced by the diel cycled fish. Some responses were similar in diel  $O_2$  cycled and mean  $P_{O_2}$ -treated fish, but overall, exposure to ecologically representative diel hypoxia cycles improved hypoxia tolerance. Diel hypoxia-induced protective responses included increased inducible HSP70 concentration and mean corpuscular hemoglobin concentration, as well as reduced plasma cortisol. Acclimation to diel hypoxia allowed metabolic rates to decline during hypoxia, reduced oxygen debt following subsequent exposures, and allowed fish to return to an anabolic phenotype. The data demonstrate that acute diel cycling hypoxia improves hypoxia tolerance in previously intolerant fish through the activation of cellular protective mechanisms and a reduction in metabolic  $O_2$  requirements.

**KEY WORDS:** Intermittent hypoxia, HSP70, Anabolism, Preconditioning, AMP-activated protein kinase

## INTRODUCTION

Hypoxia is a common, naturally occurring phenomenon in aquatic ecosystems (Dan et al., 2014; Richards, 2011; Yang et al., 2013). The principal causes are the effect of temperature on oxygen solubility (Culbertson and Piedrahita, 1996), water column density stratification (Justic et al., 2017) and biological  $O_2$  demand, which is closely linked to anthropogenic eutrophication (Duncan et al., 2012; Richardson and Jørgensen, 1996). Diel oxygen cycling, or diel cycling hypoxia (DCH), is a common phenomenon in aquatic systems where  $O_2$  partial pressure ( $P_{O_2}$ ) increases during daylight hours with photosynthetic activity and decreases overnight, sometimes leading to hypoxic conditions (<30%  $O_2$  saturation),

as a consequence of biological  $O_2$  demand (Dan et al., 2014; Yang et al., 2013). Organisms that are able to alter physiological and biochemical processes to maintain energy balance when exposed to hypoxia are more likely to survive than those that are not (Boutilier, 2001; Nilsson and Renshaw, 2004). Hypoxia-tolerant organisms respond to oxygen deprivation by modifying  $O_2$  uptake,  $O_2$  delivery and metabolism to guard against arterial blood  $O_2$  deficiency (hypoxemia) and cellular energy exhaustion (Boutilier, 2001). In contrast, the physiological responses mounted by hypoxia-intolerant fish are insufficient to effectively avoid hypoxemia and balance energy supply and demand, so they tend to behaviorally avoid hypoxic waters.

Physiological plasticity in response to hypoxia has been demonstrated in fish (Borowiec et al., 2015); a prior exposure to hypoxia can increase tolerance to a subsequent event in a process known as preconditioning (Gamperl et al., 2001, 2004). Gamperl et al. (2001, 2004) showed that preconditioned hearts and isolated cardiomyocytes from rainbow trout (*Oncorhynchus mykiss*) were better able to maintain function under subsequent hypoxic stresses. Cardioprotective processes were also activated and included an increased reliance on anaerobic glycolysis, fueled by exogenous glucose (Gamperl et al., 2001). Numerous signal transduction pathways have been identified as vital for hypoxic preconditioning, including those associated with oxygen sensing (Sheldon et al., 2014), which activate downstream pathways to improve oxygen transport/delivery (Xiao, 2015), erythropoiesis (Chen et al., 2010), angiogenesis (Bolli, 2001) and energy metabolism (Manchenkov et al., 2015).

The majority of work on DCH or similar repeated hypoxia exposures in fish has been carried out on hypoxia-tolerant species (Dan et al., 2014; Lykkeboe and Weber, 1978; Yang et al., 2013), and it is not clear whether more-sensitive species respond similarly. The epaulette shark (*Hemiscyllium ocellatum*) naturally experiences intermittent hypoxia in tidepool environments, and repeated exposure to hypoxia triggers aerobic metabolic depression and a decrease in critical oxygen tension ( $P_{crit}$ ) (Nilsson and Renshaw, 2004). In juvenile qingbo (*Spinibarbus sinensis*), DCH increased feeding and growth rates, while decreasing  $P_{crit}$ , loss of equilibrium threshold and aquatic surface respiration threshold (Dan et al., 2014). Similar results were found in southern catfish (*Silurus meridionalis*) in terms of  $P_{crit}$ , loss of equilibrium threshold and aquatic surface respiration threshold, but DCH-acclimated catfish exhibited reduced feeding and growth rates, combined with a lower maximum aerobic metabolic rate and improved critical swimming speed (Yang et al., 2013). Numerous physiological and morphological changes directed at improving  $O_2$  uptake, delivery and metabolism were also noted in killifish (*Fundulus heteroclitus*) exposed to DCH (Borowiec et al., 2015). Summer flounder (*Paralichthys dentatus*) growth rate did not acclimate to DCH and

<sup>1</sup>Department of Chemistry and Biochemistry, Mount Allison University, Sackville NB, Canada, E4L 1G8. <sup>2</sup>Département de Biologie, Université de Moncton, Moncton, NB, Canada, E1A 3E9. <sup>3</sup>Department of Ecology, Montana State University, Bozeman, MT 59717-3460, USA.

\*Author for correspondence (tmaccormack@mta.ca)

 K.J.W., 0000-0002-5939-0686; A.A.C., 0000-0003-1571-9010; S.G.L., 0000-0001-7038-4626; T.J.M., 0000-0002-6080-9413

mortality increased significantly following 2–3 weeks of extreme DCH (Davidson, 2015), which was representative of highly eutrophic estuaries. In cases where DCH ostensibly improved hypoxia tolerance, it is not clear whether changes were triggered by fluctuations in  $P_{O_2}$  or by the average decrease in  $P_{O_2}$  experienced by fish exposed to DCH conditions. If subcritical DCH is capable of preconditioning hypoxia-sensitive fish in a similar manner as for hypoxia-tolerant fish, it may allow these fish to persist in the increasingly unfavorable conditions predicted to occur with the progression of climate change (Henson et al., 2017; Stocker et al., 2013).

Relative to DCH, there are numerous studies examining the protective effect of temperature cycling in stress-sensitive species such as rainbow trout (Callaghan et al., 2016) and Atlantic salmon (Tunnah et al., 2016b). Diel thermal fluctuations were shown to mediate metabolic remodeling by inducing an increasingly less catabolic phenotype as well as sequestering and regenerating metabolic substrates in the liver with successive high temperature exposures (Callaghan et al., 2016). The mean temperature from the fish's original habitat appeared to affect responses to diel thermal cycling in Atlantic salmon (Tunnah et al., 2016b), but it is unclear whether such an effect is triggered by DCH. Because both high temperature and low  $P_{O_2}$  impose energetic stresses on fish, it is possible that the metabolic response to DCH may parallel the catabolic-to-anabolic phenotype transition exhibited in response to diel thermal cycling.

The goals of this study were to (1) determine whether exposure to DCH improves hypoxia tolerance in a putatively sensitive fish, the rainbow trout, and (2) characterize changes in key metabolic regulators involved in the maintenance of energy balance under stress. As climate change progresses, temperature and  $P_{O_2}$  are likely to become more variable in aquatic environments (Caissie et al., 2013; Stocker et al., 2013). There is also increasing recognition that the responses of animals to variable environments differs from their responses to the mean of that variation (Morash et al., 2018). It is therefore essential to understand not only how animals will cope with static, chronic stressors, but also to variable and stochastic environments. Rainbow trout were used as a model as they are hypoxia sensitive (Gamperl et al., 2001), have a well-characterized capacity for stress preconditioning (Gamperl et al., 2001, 2004), and are an economically and ecologically important species (Behnke et al., 2002; Ward and Post, 2014). We specifically focused on responses exhibited during the initial onset of diel  $P_{O_2}$  cycles, when animals are transitioning from a stable normoxic environment to an environment with chronically fluctuating  $P_{O_2}$  levels. Rainbow trout were thus exposed to ecologically relevant diel  $P_{O_2}$  cycles over 5 days and examined for a suite of responses associated with the maintenance of  $O_2$  uptake, energy homeostasis, and physiological and cellular stress indicators. We then characterized key signal transduction pathways to understand whether DCH triggers a protective remodeling of energy metabolism.

## MATERIALS AND METHODS

### Animal collection and care

Female hatchery-reared rainbow trout [*Oncorhynchus mykiss* (Walbaum 1792);  $n=26$ ; body mass  $632.0\pm 25.2$  g, length  $34.1\pm 0.6$  cm] were held in a 750 liter tank of filtered, partially recirculated freshwater at  $16\pm 0.5^\circ\text{C}$  on a 12 h:12 h day:night cycle for a minimum of 2 weeks prior to study. Fish were fed to satiation daily with sinking pellets. Food was withheld for 24 h prior to, and for the entire duration of, all experiments. Fish mass and length were not significantly different ( $P=0.824$ ) between treatment groups. All

procedures were performed with the approval of the Mount Allison University Animal Care Committee (protocol no. 16-08).

### Intermittent flow swim tunnel respirometry

A Loligo swim tunnel respirometer (Tjele, Vilborg, Denmark) was used to measure  $O_2$  consumption rates ( $\dot{M}_{O_2}$ ) in each animal as a proxy of aerobic metabolic rate. The system consisted of a darkened 30 liter holding chamber within a 120 liter reservoir. The water temperature was held at  $16\pm 1^\circ\text{C}$ .  $P_{O_2}$  and temperature readings were collected via a DAQ-M data acquisition unit and AutoResp software (Loligo Systems). Each  $\dot{M}_{O_2}$  measurement cycle consisted of a 900 s flush, 200 s wait and a 100 s measurement, culminating in one  $\dot{M}_{O_2}$  reading every 20 min. Water flow speed was set at 0.5 body lengths per second for all fish.

Hypoxia was achieved by attenuating aeration and bubbling  $N_2$  gas through air stones submerged in the swim tunnel reservoir and connected to a valve controlled by the AutoResp software. A Clark-type  $O_2$  probe interfaced with the system measured  $P_{O_2}$  levels in the reservoir and AutoResp utilized these data to control  $N_2$  flow to reach desired  $P_{O_2}$  levels. Re-oxygenation was achieved by suspending  $N_2$  gas influx and resuming aeration of the external reservoir.

### Treatment regimens

All fish were held under normoxia (20.7 kPa  $P_{O_2}$ ) for 24 h following insertion into the respirometer. Rainbow trout were exposed to one of four protocols for 135 h (Fig. 1, Table 1). (1) Acute hypoxia (AH,  $n=7$ ): fish were held for 130 h at normoxia prior to an acute hypoxic exposure (5 h, 4.2 kPa  $P_{O_2}$ ). In preliminary studies, 4.2 kPa was the lowest  $P_{O_2}$  at which naive rainbow trout could consistently survive for 5 h (data not shown). (2) Diel hypoxia fluctuation (DC,  $n=7$ ): fish were exposed to 130 h of environmentally relevant diel cycling hypoxia (Tyler et al., 2009). Deoxygenation occurred at  $\sim 2.0$  kPa  $h^{-1}$  until  $P_{O_2}$  reached 4.2 kPa, where the fish were held for 4 h before re-oxygenation. Re-oxygenation occurred at  $\sim 5.0$  kPa  $h^{-1}$  until  $P_{O_2}$  reached a maximum of 20.7 kPa where the fish were held until the next cycle of deoxygenation. Following the final deoxygenation, DC fish were held for 5 h at 4.2 kPa  $P_{O_2}$ . (3) Air-saturated control (SC,  $n=6$ ): for the entirety of the protocol. (4) Mean  $P_{O_2}$  control (MC,  $n=6$ ): fish were exposed to 12.4 kPa  $P_{O_2}$  for the entirety of the protocol, which was the mean  $P_{O_2}$  experienced by DC-treated fish. Treatment regimens were limited to 135 h to avoid prolonged fasting and to facilitate comparisons with previous studies on responses to diel thermal cycling in salmonids (Callaghan et al., 2016; Tunnah et al., 2016b). Deoxygenation rates were identical for hypoxia exposures in the AH and DC treatments.

### Tissue sampling

Prior to insertion into the respirometer, each fish was anesthetized with buffered tricaine methanesulfonate (MS-222;  $0.19$  g  $l^{-1}$ ) and pre-treatment blood samples ( $\sim 1.0$  ml) were taken from the caudal vein. Mass and length were measured and used for  $\dot{M}_{O_2}$  and swimming velocity calculations.

Following the experiment, a second blood sample was collected. At the time of sampling, SC fish were at 20.7 kPa, MC fish were at 12.4 kPa, and AH and DC fish were at 4.2 kPa  $P_{O_2}$ . Fish were then placed in an anesthetic bath (300 mg  $l^{-1}$  tricaine methanesulfonate buffered with 600 mg  $l^{-1}$   $\text{NaHCO}_3$ ) until ventilation ceased, and killed by spinal transection. Heart ventricle and liver were quickly collected, frozen in liquid  $N_2$  and stored at  $-80^\circ\text{C}$ . Hemoglobin and hematocrit levels were measured on fresh blood immediately following sampling. Blood samples were then centrifuged (5000 g

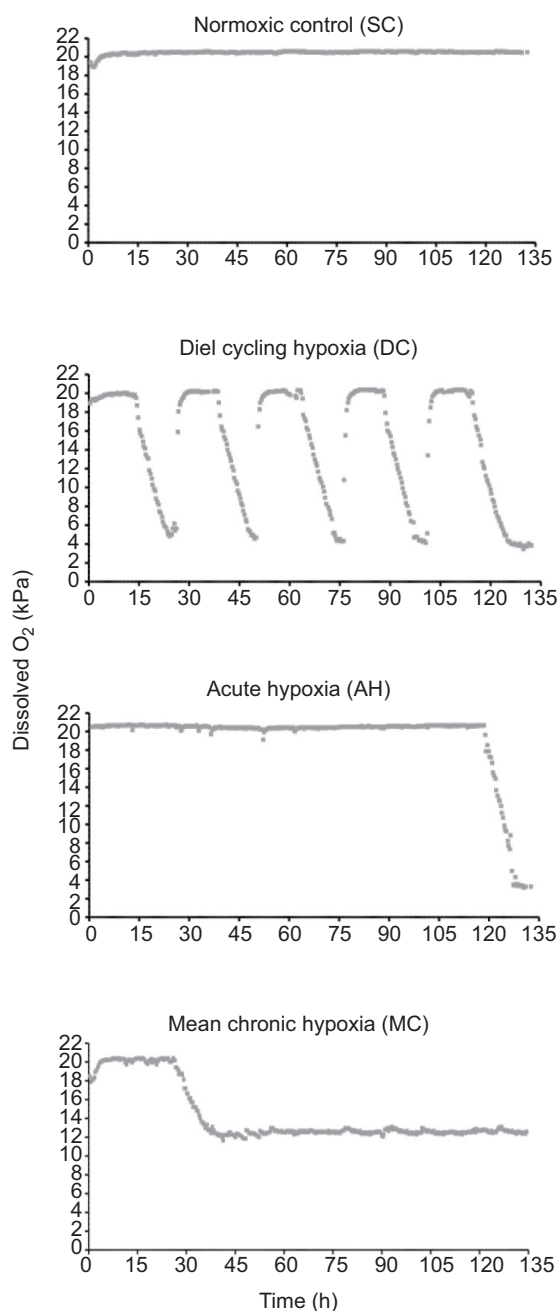

**Fig. 1. Swim-tunnel respirometer parameters for each experimental treatment group.** Rainbow trout (*Oncorhynchus mykiss*) were held at 16°C throughout the treatment regime and were exposed to either normoxic (SC,  $n=6$ ), diel cycling hypoxia (DC,  $n=7$ ), acute hypoxia (AH,  $n=7$ ) or mean oxygen tension (MC,  $n=6$ ). Dissolved oxygen saturation (%) was modified at specific time points and rates ( $\text{kPa O}_2 \text{ h}^{-1}$ ). Blood and tissue samples were collected at the 135 h mark at the oxygen tension that the fish was held during the last phase of their treatment regime.

for 10 min, at 4°C), and plasma was collected, frozen in liquid N<sub>2</sub> and stored at -80°C.

#### Hematological analyses

Hemoglobin levels were measured using a HemoCue HB 201+ (HemoCue America, CA, USA). Hematocrit levels were determined by measuring the height of packed erythrocyte versus that of total blood [(height of packed red blood cells/total blood height)×100%]

following centrifugation in micro-hematocrit capillary tubes. Mean corpuscular hemoglobin concentration (MCHC) was calculated as described in Tunnah et al. (2016a). Plasma cortisol levels were measured by ELISA according to the manufacturer's instructions (Neogen Corp., KY, USA).

#### Plasma and tissue metabolites

Plasma and tissue samples were homogenized in cold 6% perchloric acid and centrifuged at 10,000  $g$  for 3 min, and supernatants were collected for glucose and lactate determination. Glucose was quantified spectrophotometrically at 340 nm by following the production of NADPH using a hexokinase and glucose-6-phosphate dehydrogenase coupled assay (MacCormack et al., 2003). Lactate was also quantified spectrophotometrically at 340 nm by following the oxidation of NADH by lactate dehydrogenase in a glycine-hydrazine buffer (MacCormack et al., 2003). Glycogen in liver and heart was extracted in 2% Na<sub>2</sub>SO<sub>4</sub> and absolute ethanol, hydrolyzed to glucose by boiling in 1.2 mol l<sup>-1</sup> HCl, and enzymatically quantified as glucose using the above assay (Callaghan et al., 2016). Triacylglycerol (TAG) content was measured as glycerol equivalents using a colorimetric assay kit (Cayman Chemical, Ann Arbor, MI, USA).

#### Protein extraction and immunoblotting

Tissue samples were initially homogenized in TRIS buffer [50 mmol l<sup>-1</sup> TRIS (pH 8), 0.1 mmol l<sup>-1</sup> EDTA, 1.0 mmol l<sup>-1</sup> β-mercaptoethanol, pH 8, containing 1 mmol l<sup>-1</sup> PMSF and 1 mmol l<sup>-1</sup> sodium orthovanadate (as inhibitors of proteases and phosphatases, respectively)] using a sonicating homogenizer (Q55 Sonicator, Qsonica) and then centrifuged (10,000  $g$  for 3 min). Soluble protein was further prepared for SDS-PAGE as previously detailed (Capaz et al., 2017; Lamarre et al., 2016). Protein concentration was determined using a Bradford Protein Assay (Bio-Rad, Hercules, CA, USA).

Protein (15 μg per well) was loaded into 4–15% TGX Gels (Bio-Rad) with an anti-rabbit compatible MagicMark™ XP Western Standard protein ladder (Thermo-Fisher Scientific). Proteins were electrophoresed in TGX gels and then transferred onto PVDC membranes using semi-dry Trans-Blot® Turbo Modules (Bio-Rad). A stain-free image of the membrane was taken for protein normalization using a Bio-Rad Chemidoc Touch Imaging System. Membranes were blocked in 5% BSA in 1× tris-buffered saline with Tween 20 (TBST). All primary and secondary antibodies were validated for use in fish tissue (Callaghan et al., 2016; Lamarre et al., 2012; Tunnah et al., 2016b) and are detailed in Table 2. Relative phosphorylation of a specific protein was calculated as the ratio of phosphorylated protein versus total protein expression.

#### Data analysis and statistics

Statistical analyses were carried out using either Prism 5 (GraphPad Software Inc., La Jolla, CA, USA) or R (<https://www.r-project.org/>). Data were tested for normality via the Shapiro–Wilk test by analyzing all cases together, and normally distributed data were then tested for homogeneity of variance via a Levene's test. In all instances, significance was assigned at  $P \leq 0.05$ , and all values are presented as means±s.e.m.

All  $\dot{M}_{O_2}$  measurements based on  $P_{O_2}$  slopes with an  $R^2$  less than 0.75 were excluded (63 of 2912 measurements; 2.1%). Between-treatment comparisons of  $\dot{M}_{O_2}$  are based on the timeline of the DC group, where the stages were: post-insertion recovery, hypoxia 1, recovery 1, etc., until the final extended hypoxia. The mean  $\dot{M}_{O_2}$  for each treatment at each stage was calculated once  $P_{O_2}$  plateaued at a maximum or minimum state (20.7 and  $4.2 \pm 0.3$  kPa) until the next

**Table 1. Swim-tunnel respirometer parameters for each experimental treatment group (see Fig. 1)**

| Oxygenation profile       | Time (h)        | Range (% O <sub>2</sub> ) | Δ % O <sub>2</sub> | Ramp rate (kPa O <sub>2</sub> h <sup>-1</sup> ) | Min./max. duration (h) |
|---------------------------|-----------------|---------------------------|--------------------|-------------------------------------------------|------------------------|
| Normoxic control (SC)     | 24–135          | 95–100                    | 5                  | –                                               | –                      |
|                           | 0–24 (recovery) | 100                       | 0                  | –                                               | –                      |
| Diel cycling hypoxia (DC) | 0–24 (recovery) | 95–100                    | 5                  | –                                               | –                      |
|                           | 24–32           | 100–20                    | 60                 | 2                                               | 3–4                    |
|                           | 36–42           | 20–100                    | 60                 | 5                                               | 6–8                    |
|                           | 48–56           | 100–20                    | 60                 | 2                                               | 3–4                    |
|                           | 60–66           | 20–100                    | 60                 | 5                                               | 6–8                    |
|                           | 72–80           | 100–20                    | 60                 | 2                                               | 3–4                    |
|                           | 84–90           | 20–100                    | 60                 | 5                                               | 6–8                    |
|                           | 96–104          | 100–20                    | 60                 | 2                                               | 3–4                    |
|                           | 106–108         | 20–100                    | 60                 | 5                                               | 6–8                    |
|                           | 112–130         | 100–20                    | 60                 | 2                                               | 5                      |
| Acute hypoxia (AH)        | 0–24 (recovery) | 95–100                    | 5                  | –                                               | –                      |
|                           | 24–118          | 100                       | 0                  | –                                               | –                      |
|                           | 118–130         | 100–20                    | 60                 | 2                                               | 5                      |
| Mean chronic hypoxia (MC) | 0–24 (recovery) | 95–100                    | 5                  | –                                               | –                      |
|                           | 24–38           | 100–60                    | 40                 | 2                                               | –                      |
|                           | 38–135          | 60                        | 0                  | –                                               | 97                     |

All experiments were performed at 16°C.

deoxygenation or re-oxygenation. The mean  $\dot{M}_{O_2}$  across the different stages was analyzed by a two-way repeated-measures ANOVA and Bonferroni *post hoc* tests. Critical O<sub>2</sub> tension ( $P_{crit}$ ) was determined for each hypoxic stage of the DC treatment and the single hypoxic exposure in the AH treatment using a segmented regression analysis according to established methods (Yeager and Ultsch, 1989).  $P_{crit}$  values across the DC treatment were compared using a repeated-measures ANOVA or Tukey's HSD.  $P_{crit}$  values for the final extended hypoxia in AH and DC treatments were compared using a two-tailed *t*-test.

Excess post-hypoxia O<sub>2</sub> consumption (EPHOC) in DC fish was determined using R. First, the standard metabolic rate (SMR) of each fish was estimated based on quantile analyses of  $\dot{M}_{O_2}$  data collected >300 min after return to normoxia. Previous researchers have used the 0.2 quantile to estimate SMR (Chabot et al., 2016); here, the 0.25 quantile was chosen to ensure a minimum of 10 data points were included in this estimate. Quantiles were calculated using the calcSMR function of the fishMO<sub>2</sub> package (<https://www.researchgate.net/project/fishMO2-a-R-package-to-calculate-and-plot-SMR-O2crit-and-SDA>). To estimate EPHOC,  $\dot{M}_{O_2}$  at hypoxia exposure recovery times was modeled as a general additive model using the 'gam' function of the mgcv package (Wood, 2011). Fitted  $\dot{M}_{O_2}$  curves were produced for each fish, except for one in the DC

treatment regime that was identified as an outlier using a Grubbs outlier test. For all gam models, arguments included a *k* value of -1, 'Gamma' as family, an fx of 'F', and a 'tp' bases. EPHOC duration (EPHOC<sub>duration</sub>) was estimated as the time elapsed since returning to normoxia until the point where fitted recovery  $\dot{M}_{O_2}$  and SMR no longer differed; specifically, where fitted recovery  $\dot{M}_{O_2}$  minus the associated s.e.m. was first ≤ SMR plus a 5% tolerance limit. Total EPHOC was determined by subtracting the area under the SMR curve over the EPHOC<sub>duration</sub> from the area under the fitted recovery  $\dot{M}_{O_2}$  curve.

Hematological parameters were analyzed using two-way ANOVAs with Tukey *post hoc* tests. Metabolite and protein expression measurements were analyzed using one-way ANOVAs with Tukey *post hoc* tests. Protein expression was normalized to total protein and then SC protein levels.

## RESULTS

### Physiological and cellular stress

Whole-organism stress was assessed using plasma cortisol and lactate, and protein poly-ubiquitylation and HSP70 relative concentration. Pre-treatment cortisol and lactate levels were 9.5±0.5 ng ml<sup>-1</sup> and 1.9±0.1 mmol l<sup>-1</sup>, respectively, and were not different between groups ( $P=0.67$  and  $P=0.79$ , respectively; data not shown). AH fish had post-treatment cortisol concentrations 2.5- to

**Table 2. Western blot antibodies used to assess carbohydrate, lipid and protein metabolism, as well as physiological stress responses**

| Signal transduction category  | Protein         | Target                                | Dilution | Provider                  | Catalog no. |
|-------------------------------|-----------------|---------------------------------------|----------|---------------------------|-------------|
| Carbohydrate metabolism       | AMPK $\alpha$   | Arg <sup>3/7</sup>                    | 1:1000   | Cell Signaling Technology | 5831        |
|                               | pAMPK $\alpha$  | pThr <sup>172</sup>                   | 1:1000   | Cell Signaling Technology | 2535        |
|                               | AMPK $\beta$    | His <sup>233</sup>                    | 1:1000   | Cell Signaling Technology | 4150        |
|                               | pAMPK $\beta$   | pSer <sup>108</sup>                   | 1:1000   | Cell Signaling Technology | 4181        |
| Lipid metabolism              | ACC             | Ser <sup>523</sup>                    | 1:1000   | Cell Signaling Technology | 3676        |
|                               | pACC            | pSer <sup>79</sup>                    | 1:1000   | Cell Signaling Technology | 11818       |
|                               | Akt             | Cys <sup>67</sup> /Glu <sup>7</sup>   | 1:1000   | Cell Signaling Technology | 4691        |
|                               | pAkt            | Ser <sup>473</sup>                    | 1:1000   | Cell Signaling Technology | 9271        |
| Protein metabolism            | 4E-BP1          | His <sup>11/53</sup>                  | 1:1000   | Cell Signaling Technology | 9644        |
|                               | p4E-BP1         | Thr <sup>37/46</sup>                  | 1:1000   | Cell Signaling Technology | 2855        |
|                               | eIF-2 $\alpha$  | Asp <sup>3/7</sup>                    | 1:1000   | Cell Signaling Technology | 5329        |
|                               | pEIF-2 $\alpha$ | Ser <sup>51</sup> /Arg <sup>8/9</sup> | 1:1000   | Cell Signaling Technology | 3398        |
| Physiological stress response | PolyUb          | Lys-48 linked poly-ubiquitin          | 1:1000   | Abcam Canada              | ab190061    |
|                               | Inducible HSP70 | B5X4Z3                                | 1:10000  | Agrisera Antibodies       | AS05 061A   |
| Secondary antibody            | N/A             | Anti-rabbit immunoglobulin            | 1:5000   | Cell Signaling Technology | 7074        |
|                               | N/A             | Anti-rabbit HSP70 immunoglobulin      | 1:5000   | Agrisera Antibodies       | AS09 602    |

10-fold higher than those of other groups ( $P=0.001$ ). Cortisol concentrations did not significantly differ between the SC, MC and DC fish (Fig. 2A). Post-treatment plasma lactate levels were 1.5–3 fold higher in AH fish relative to other treatments ( $P<0.001$ ; Fig. 2B). Fish in the DC group exhibited plasma lactate concentrations ~2-fold higher than those of SC fish ( $P<0.001$ ), but not different from those of MC fish. Plasma lactate levels in MC fish were not significantly different from those in the SC or DC groups.

Liver protein K48 poly-ubiquitylation was increased by 2- to 6-fold in AH fish ( $P<0.001$ ; Fig. 2C), whereas no changes were noted in other treatments. In heart, poly-ubiquitylation was elevated in both AH and DC fish relative to SC and MC fish ( $P=0.041$ ).

HSP70 concentration was significantly higher ( $P<0.001$ ; Fig. 2D) following the DC treatment in both liver (~2000-fold increase) and heart (~18-fold increase) relative to all other

treatments (Fig. 2D). In AH fish, liver HSP70 levels were significantly higher than in SC and MC fish, but this was not the case for the heart.

#### Aerobic metabolism and O<sub>2</sub> uptake capacity

The  $\dot{M}_{O_2}$  of each fish was continuously measured in each of the four treatment regimens (Fig. 3). Approximately 10 h following insertion into the respirometer, fish reached a baseline  $\dot{M}_{O_2}$  of  $124 \pm 5.7$  mg O<sub>2</sub> kg<sup>-1</sup> h<sup>-1</sup> (Fig. 4A). The  $\dot{M}_{O_2}$  of the AH fish was not significantly different from that of the SC fish at any point, even during the acute hypoxia exposure. The mean  $\dot{M}_{O_2}$  of the AH fish during hypoxia was similar to that of the DC fish during their first hypoxia exposure. DC fish exhibited depressed  $\dot{M}_{O_2}$  during each subsequent hypoxia exposure that was significantly lower than those of all other groups at the same time points. This corresponded

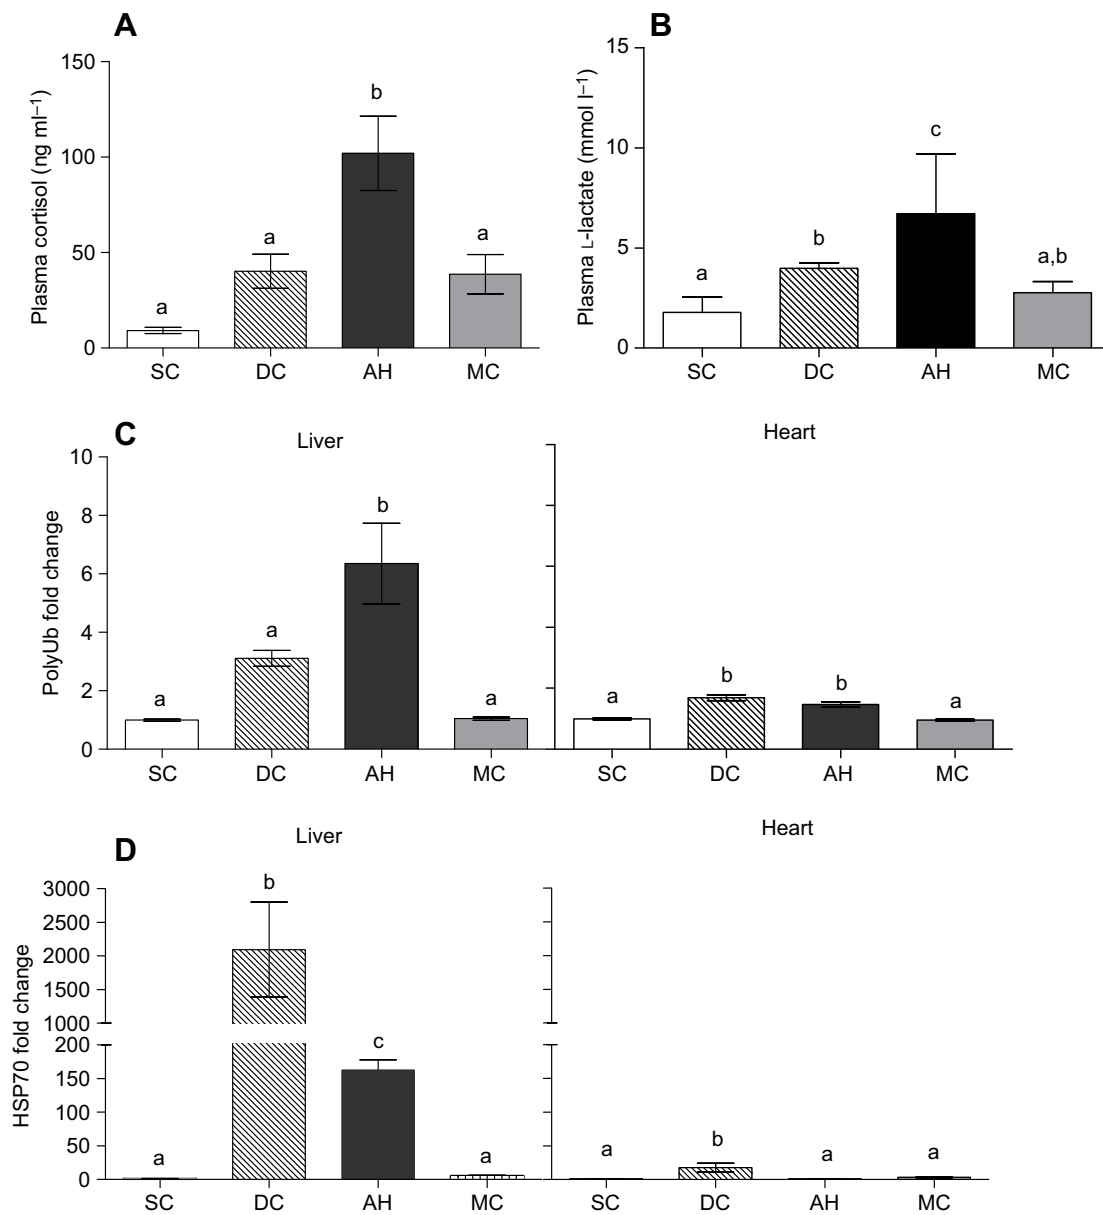

**Fig. 2. Physiological stress response markers in rainbow trout (*O. mykiss*) exposed to normoxic (SC,  $n=6$ ), diel cycling hypoxia (DC,  $n=7$ ), acute hypoxia (AH,  $n=7$ ) or mean oxygen tension (MC,  $n=6$ ) treatments. (A) Post-treatment plasma cortisol, (B) pre- and post-treatment plasma lactate, and (C,D) fold change of liver and heart poly-ubiquitin (PolyUb) and heat shock protein 70 (HSP70) relative to SC treatment. Data are expressed as means  $\pm$  s.e.m. and statistically significant differences ( $P<0.05$ , two-way ANOVA with Tukey *post hoc* tests) are indicated by dissimilar letters.**

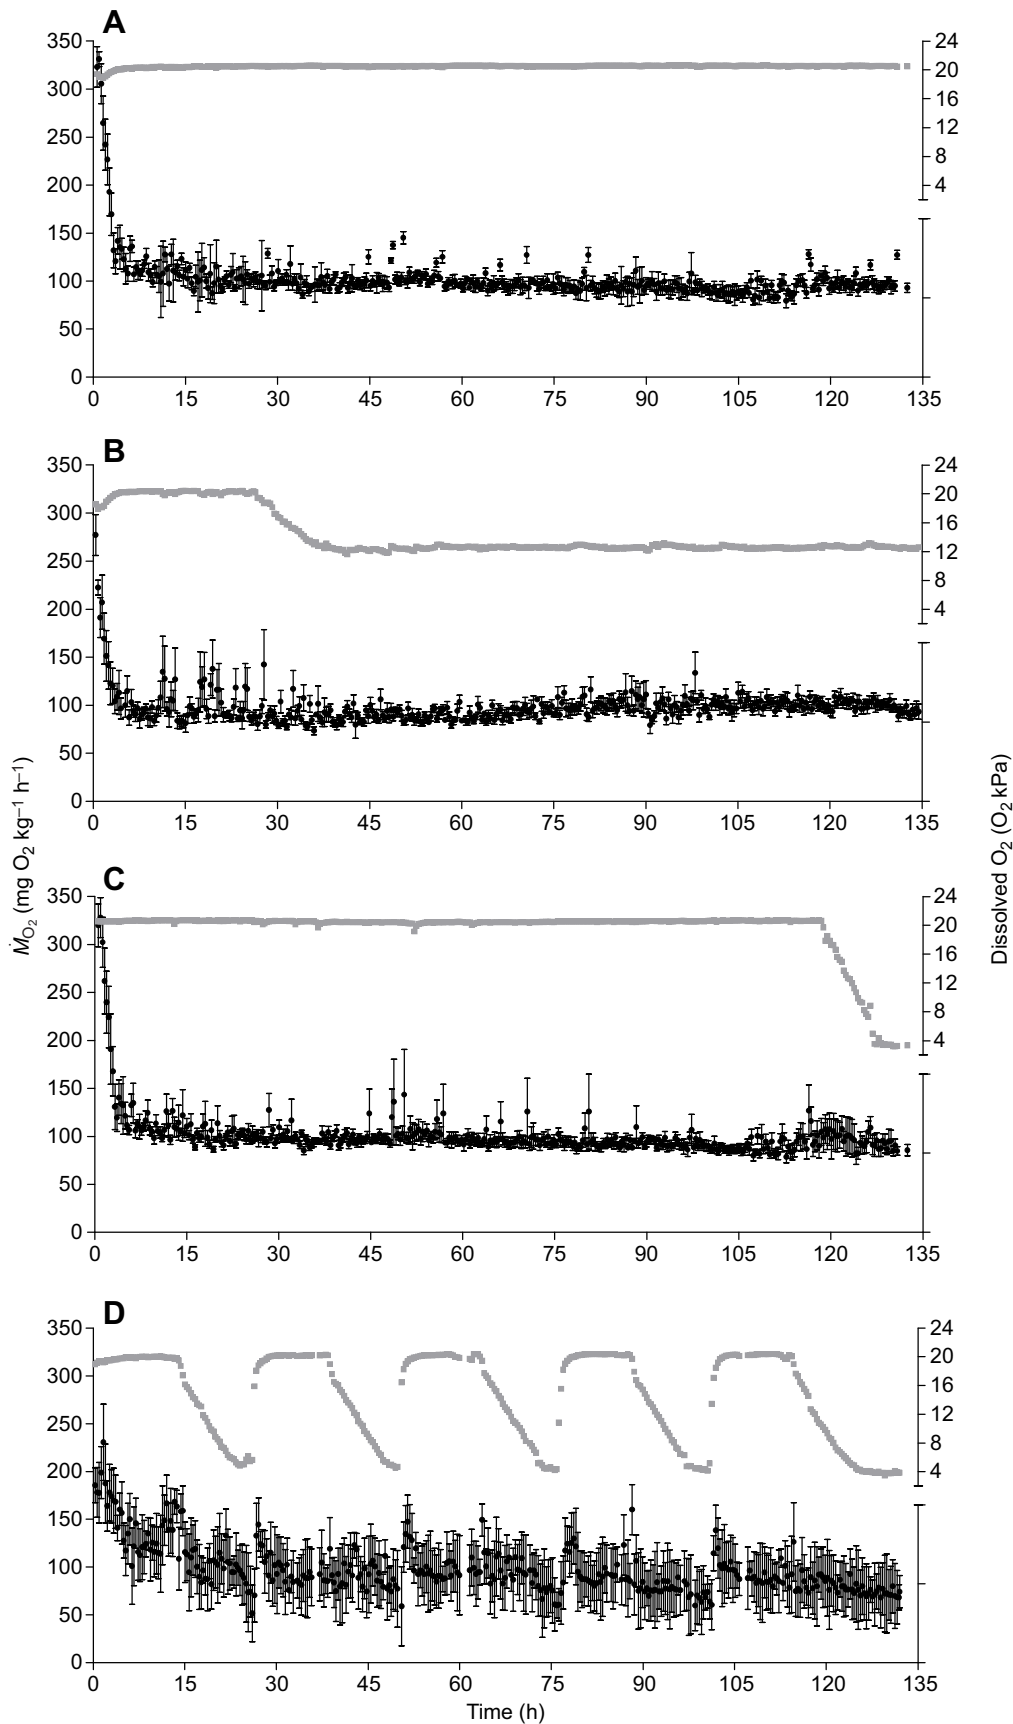

**Fig. 3.** Aerobic metabolic rate ( $\dot{M}_{O_2}$ ; black) and measured ambient partial pressures of  $\text{O}_2$  ( $\text{O}_2$  kPa; gray) in each of the four treatment groups studied. (A) Normoxic (SC;  $n=6$ ), (B) diel cycling hypoxia (DC;  $n=7$ ), (C) acute hypoxia (AH;  $n=7$ ) and (D) mean  $\text{O}_2$  tension (MC;  $n=6$ ).  $\dot{M}_{O_2}$  data represent the means  $\pm$  s.e.m. of the  $\dot{M}_{O_2}$  at each time point for all fish in a treatment group.

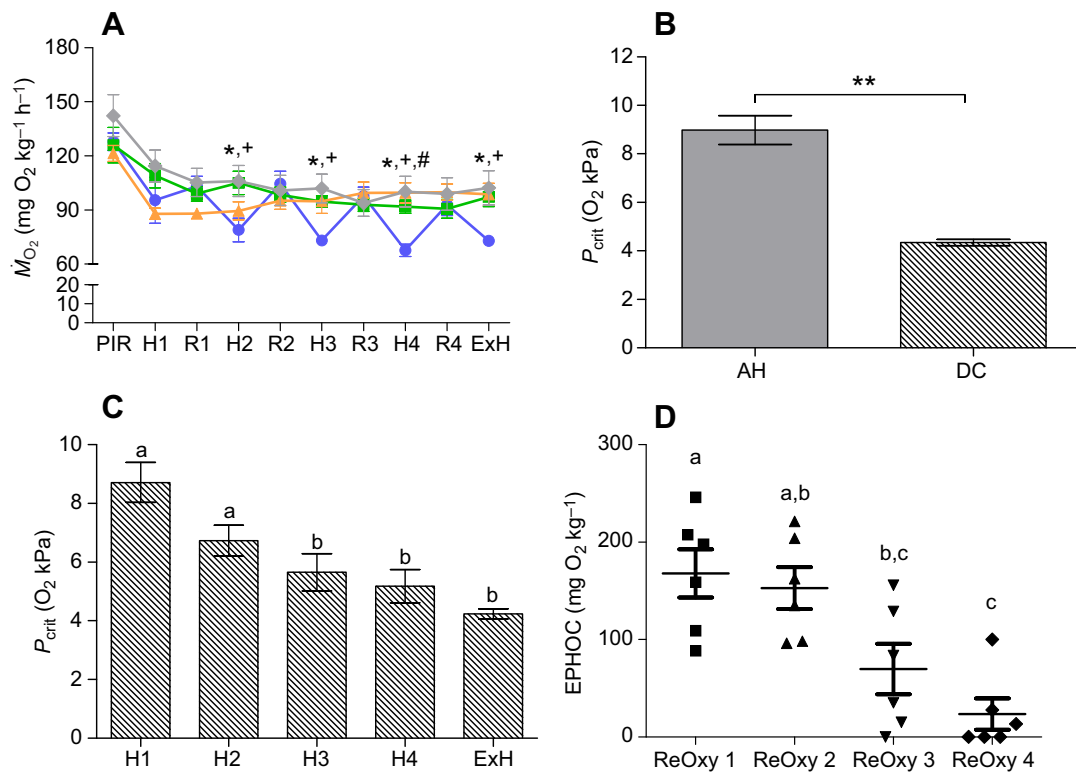

**Fig. 4.** Average aerobic metabolic rates ( $\dot{M}_{O_2}$ ), critical oxygen tension ( $P_{\text{crit}}$ ) and excess post-hypoxia oxygen consumption (EPHOC) in rainbow trout (*O. mykiss*) exposed to normoxic (SC,  $n=6$ ), diel cycling hypoxia (DC,  $n=7$ ), acute hypoxia (AH,  $n=7$ ) or mean oxygen tension (MC,  $n=6$ ) treatments. (A) Mean  $\dot{M}_{O_2}$  for each treatment group relative to the DC treatment group: post-insertion recovery (PIR), hypoxic 1 (H1), recovery 1 (R1), until the extended hypoxia (ExH). Statistically significant differences ( $P<0.05$ , two-way repeated-measures ANOVA and Bonferroni *post hoc* tests) are represented by \* (DC versus AH), # (DC versus MC) or + (DC versus SC). (B)  $P_{\text{crit}}$  during the final extended hypoxia for DC and AH fish (\*\* $P<0.001$ , repeated-measures ANOVA and Tukey's HSD *post hoc* tests). (C)  $P_{\text{crit}}$  values obtained for each successive hypoxia exposure for DC-treated fish. (D) EPHOC following each re-oxygenation in the DC treatment group. For C and D, significant differences between either stages or treatment groups are indicated by dissimilar letters ( $P<0.05$  repeated-measures ANOVA and Tukey's HSD *post hoc* tests).

with a reduction in EPHOC so that by the third re-oxygenation, it was reduced by >6-fold (Fig. 4D). By the final extended hypoxia exposure, DC fish exhibited an  $\dot{M}_{O_2}$  of  $72\pm 1.8 \text{ mg O}_2 \text{ kg}^{-1} \text{ h}^{-1}$  compared with  $97\pm 4.6 \text{ mg O}_2 \text{ kg}^{-1} \text{ h}^{-1}$  in SC and MC fish ( $P<0.001$ ; Fig. 4A). Evidence of improved hypoxia tolerance in DC fish was also demonstrated by a progressive decrease in  $P_{\text{crit}}$ : the  $P_{\text{crit}}$  of DC fish was half that of AH fish by day 5 ( $P=0.003$ ; Fig. 4B). DCH did not affect SMR under normoxia, as in DC fish it was not different from the other treatment groups by the end of each normoxic recovery (Fig. 4A).

Pre-treatment hematocrit and MCHC were not different among the treatment groups ( $P=0.3$  and  $P=0.6$ , respectively; Fig. 5). Post-treatment hematocrit was significantly elevated in DC fish relative to the SC treatment group. Hemoglobin and MCHC were significantly elevated in DC fish relative to all other treatments. The apparent increase in  $\text{O}_2$  uptake and transport capacity, along with the depression of hypoxic  $\dot{M}_{O_2}$ , also likely explains why plasma lactate levels in DC fish were low relative to those of AH fish following the extended hypoxia ( $P=0.001$ ; Fig. 2B).

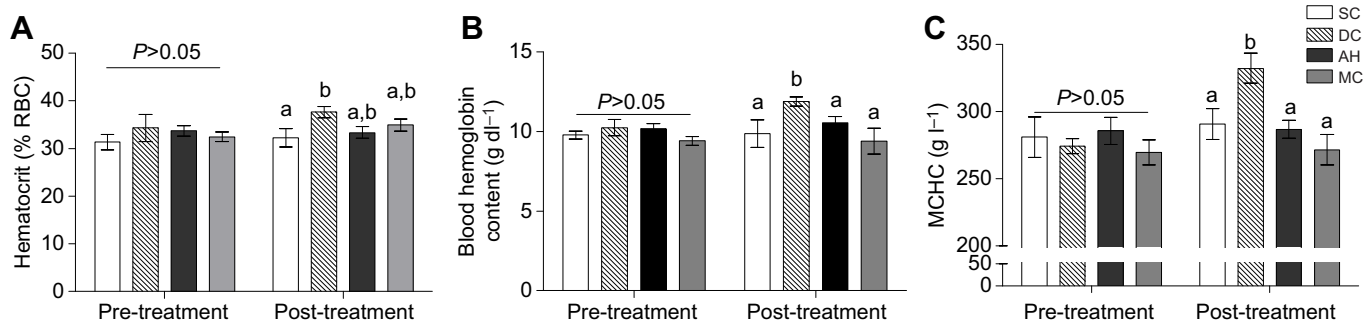

**Fig. 5.** Pre- and post-treatment hematocrit, hemoglobin and mean corpuscular hemoglobin concentration (MCHC) in rainbow trout (*O. mykiss*) exposed to normoxic (SC,  $n=6$ ), diel cycling hypoxia (DC,  $n=7$ ), acute hypoxia (AH,  $n=7$ ) or mean oxygen tension (MC,  $n=6$ ) treatments. (A) Hematocrit, (B) blood hemoglobin concentration and (C) MCHC. Significant differences ( $P<0.05$ , two-way repeated-measures ANOVA and Bonferroni *post hoc* tests) between treatment groups are indicated by dissimilar letters.

### Tissue energy metabolism

Data on the phosphorylation state of AMPK $\alpha$  and  $\beta$ , and tissue glycogen content provided insight into the effects of DCH on the regulation of carbohydrate metabolism (Fig. 6). The phosphorylation of liver AMPK $\alpha$  increased in AH fish relative to

other groups (Fig. 6A), but no changes were noted in either DC or MC fish. Heart AMPK $\alpha$  phosphorylation did not differ among treatments, and there were no changes in AMPK $\beta$  phosphorylation in either liver or heart (Fig. 6B). Therefore, AMPK was active in all fish as the compulsory phosphorylation of AMPK $\beta$  was similar

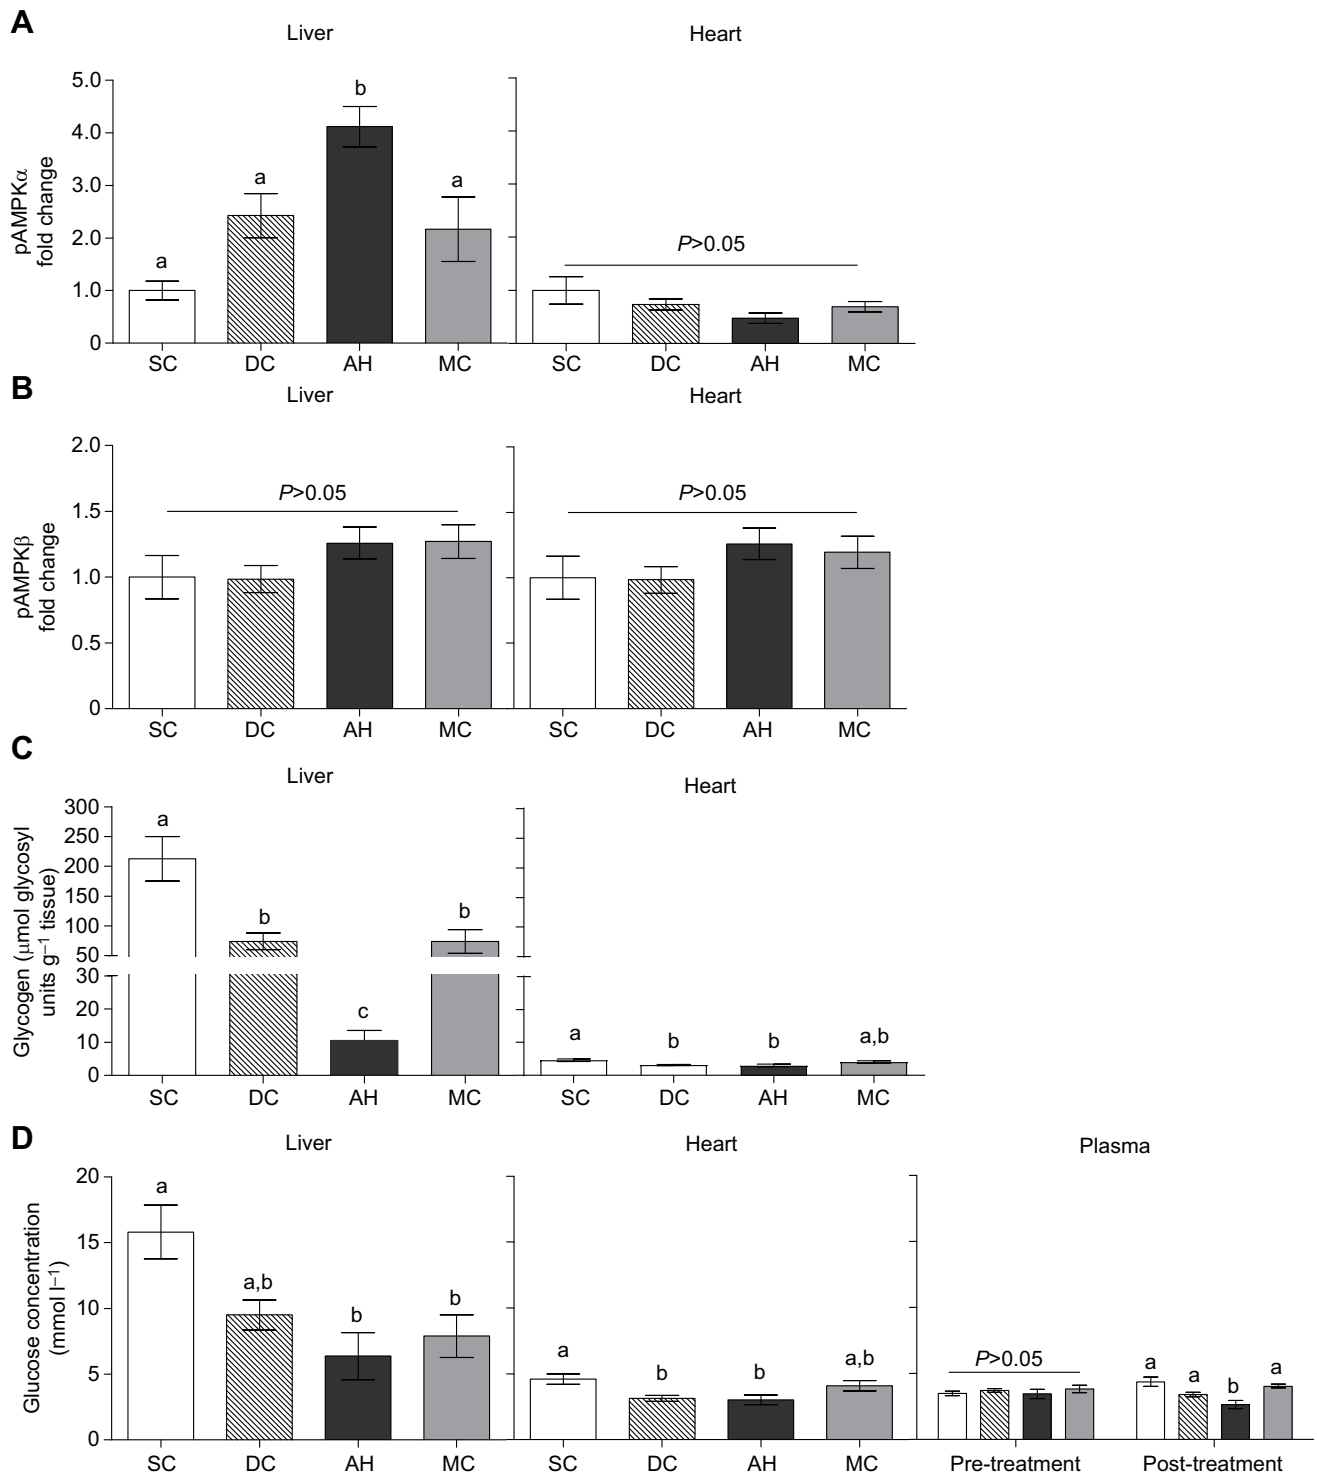

**Fig. 6.** Markers of carbohydrate metabolism, 5' AMP-activated protein kinase (AMPK)  $\alpha/\beta$ , glycogen and glucose in rainbow trout (*O. mykiss*) exposed to normoxic (SC,  $n=6$ ), diel cycling hypoxia (DC,  $n=7$ ), acute hypoxia (AH,  $n=7$ ) or mean oxygen tension (MC,  $n=6$ ) treatments. The control of cellular carbohydrate metabolism was assessed by the phosphorylation of AMPK $\alpha/\beta$  (A,B) in liver and heart, normalized by the SC group. Glucose utilization and storage was assessed through measurements of liver and heart glycogen (C), as well as liver, heart and plasma free glucose (D). Significant differences ( $P<0.05$ , one-way ANOVA and Tukey *post hoc* tests) between treatment groups are indicated by dissimilar letters.



throughout, but AH fish exhibited the highest level of activation owing to elevated AMPK $\alpha$ . The activation of AMPK $\alpha$  in the liver of AH fish likely led to the significant depletion of glycogen in these animals (Fig. 6C). Heart glycogen was lower in both DC and AH fish relative to SC fish. Liver free glucose content was lower in AH and MC fish relative to SC fish, but the difference between DC and SC fish was not significant (Fig. 6D). Heart glucose was lower in DC and AH fish relative to SC fish. Furthermore, there was a significant post-treatment reduction in plasma glucose in AH fish relative to other treatments.

Liver lipid metabolism was not affected by any treatment but a number of changes were observed in the heart (Fig. 7). Heart acetyl-CoA carboxylase (ACC) phosphorylation was higher in DC than MC fish, but it did not differ from other treatments. Heart TAG stores were significantly depleted in both DC and AH fish relative to the SC group.

Protein synthesis regulator activation in liver was depressed in AH fish relative to controls (Fig. 8), as suggested by the relative phosphorylation of Akt's downstream protein synthesis effectors, i.e. the significant reduction of 4E-BP1 phosphorylation and the increase in eIF-2 $\alpha$  phosphorylation. The inverse phosphorylation of 4E-BP1 and eIF-2 $\alpha$  would initiate the deactivation of energetically costly survival and proliferation pathways such as glycogen, lipid and protein synthesis under acute stress conditions (Callaghan et al., 2016). DC fish exhibited elevated levels of liver Akt phosphorylation relative to controls, but 4E-BP1 and eIF-2 $\alpha$  phosphorylation did not differ, potentially indicating initial activation of survival pathways. eIF-2 $\alpha$  could not be detected in the heart of any fish, and other markers of cardiac protein synthesis were unaffected by the treatments (Fig. 8C).

## DISCUSSION

Many fish are naturally exposed to chronic cycles in environmental O<sub>2</sub> availability, but we know little about the mechanisms used to

survive such conditions (Borowiec et al., 2015; Dan et al., 2014; Remen et al., 2012; Yang et al., 2013). Here, we show that a putatively hypoxia-sensitive species responds differently to diel cycling than to acute hypoxia. Trout progressively adopted a more hypoxia-tolerant phenotype as cycling progressed, likely increasing O<sub>2</sub> uptake and transport through increases in hematocrit and MCHC, reducing hypoxic  $\dot{M}_{O_2}$ , re-activating anabolic metabolism, and massively upregulating chaperone protein levels. Plasma cortisol in DC fish was also lower than in AH fish, suggesting that physiological stress also diminished as animals acclimated to DCH. Metabolic phenotype switching was also exhibited by rainbow trout exposed to diel thermal cycling (Callaghan et al., 2016), suggesting the response is not unique to a particular stressor and may be a general approach for maintaining homeostasis during cyclic and/or chronic energetic challenges. These findings have important implications for understanding how aquatic animals will cope with increases in environmental variability associated with the progression of climate change (Henson et al., 2017).

### DCH tempers the stress response and promotes HSP70

Fish in the DC group presumably responded to their first hypoxia exposure in a manner similar to that of animals in the AH group, with a pronounced increase in plasma cortisol (Figs 2–4) aimed at mobilizing energy stores to fuel an escape response (Das et al., 2018). Under chronic stress, however, heightened activity and sustained catabolism can rapidly deplete energy stores and endanger survival, or at minimum impair growth and reproduction (Mommensen et al., 1999). After the fifth hypoxia exposure, cortisol was lower in DC than in AH fish and was similar to that of normoxic animals, suggesting a reduction in stress. Cortisol levels can normalize with continued stress (Vijayan and Leatherland, 1990), but this interpretation is supported by

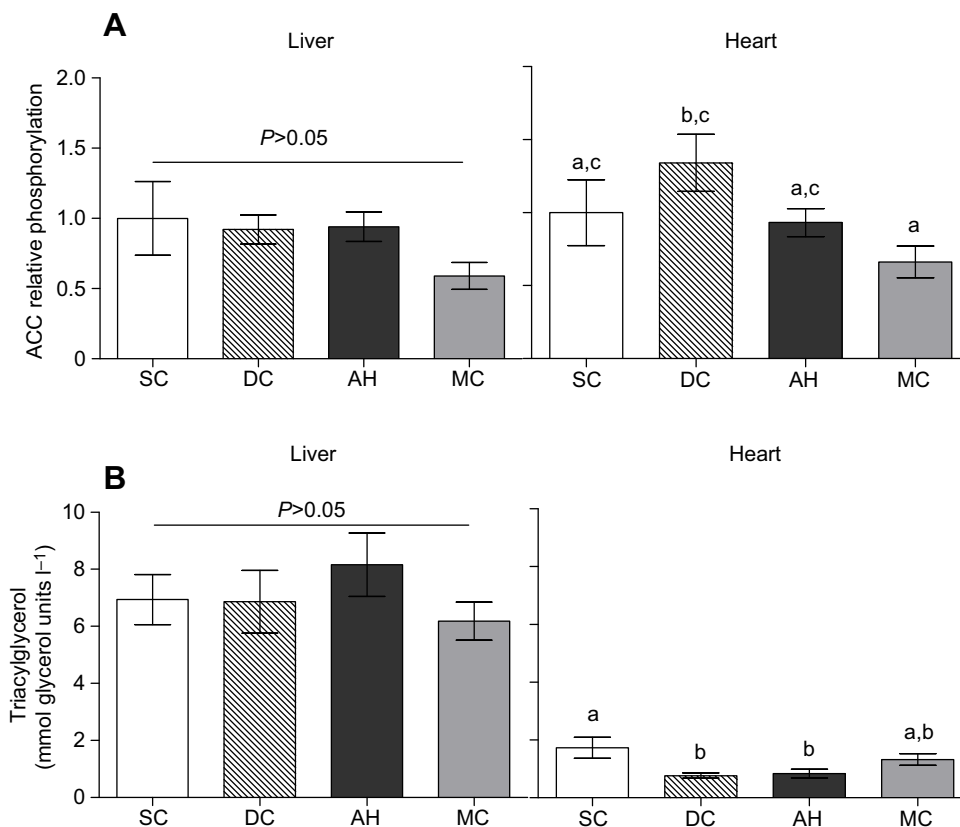

**Fig. 7. Markers of lipid metabolism, acetyl-CoA carboxylase (ACC) and triacylglycerol in rainbow trout (*O. mykiss*) exposed to normoxic (SC,  $n=6$ ), diel cycling hypoxia (DC,  $n=7$ ), acute hypoxia (AH,  $n=7$ ) or mean oxygen tension (MC,  $n=6$ ) treatments. The control of liver and heart lipid metabolism was assessed by the relative phosphorylation of ACC (A) normalized by the SC group. Lipid utilization and storage was assessed through measurements of tissue triacylglycerol (B). Significant differences ( $P < 0.05$ , one-way ANOVA and Tukey *post hoc* tests) between treatment groups are indicated by dissimilar letters.**

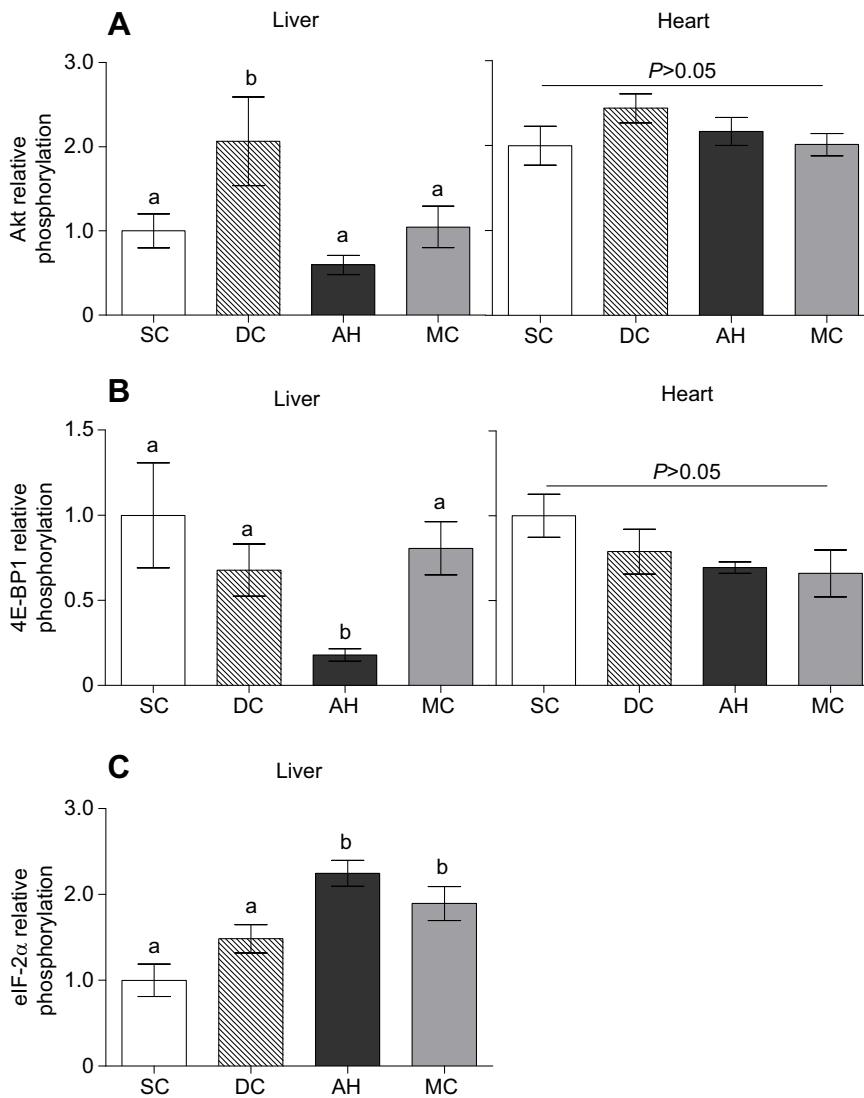

**Fig. 8. Markers of protein metabolism, protein kinase B (Akt), Eukaryotic translation initiation factor 4E-binding protein 1 (4E-BP1) and Eukaryotic translation initiation factor 2A (eIF2A) in rainbow trout (*O. mykiss*) exposed to normoxic (SC,  $n=6$ ), diel cycling hypoxia (DC,  $n=7$ ), acute hypoxia (AH,  $n=7$ ) or mean oxygen tension (MC,  $n=6$ ) treatments.** The control of cellular protein metabolism was assessed by the relative phosphorylation of Akt (A), 4E-BP1 (B) and eIF-2 $\alpha$  (C) in both the liver and heart normalized by the SC group. Note that eIF-2 $\alpha$  could not be detected in heart tissue. Significant differences ( $P<0.05$ , one-way ANOVA and Tukey *post hoc* tests) between treatment groups are indicated by dissimilar letters.

attendant declines in plasma lactate, liver protein polyubiquitylation and evidence of metabolic remodeling (see below).

Heat shock proteins are vital to maintain protein functionality under stress and cellular dysfunction (Basu et al., 2002), as the accumulation of misfolded proteins is energetically expensive and cytotoxic. The relative concentration of liver HSP70 was 14- to 2000-fold higher in DC fish than in others (Fig. 2D), with smaller increases observed in the heart. The absolute concentration of HSP70 was not quantified, so comparisons with other species are restricted to the relative magnitude of the heat shock response and do not account for differences in basal HSP70 expression. Acute hypoxia increases hepatic HSP70 levels in hypoxia-sensitive Atlantic cod (Methling et al., 2010), but not in the more tolerant Nile tilapia (*Oreochromis niloticus*) (Delaney and Klesius, 2004), and only relatively minor changes are noted in anoxia-tolerant carp (*Cyprinus carpio*) under chronic hypoxia (Poon et al., 2007). To our knowledge, this is the first examination of chaperone levels in fish exposed to DCH and the magnitude of the liver heat shock response implies that it plays a vital role in the response to this stressor. In an analogous study on thermal treatments, liver HSP70 levels were lower in Atlantic salmon exposed to diel thermal cycles than to an acute thermal stress (Tunnah et al., 2016b). Species- and stress-specific differences make it difficult to infer whether the observed

increase in HSP70 leads to improvements in hypoxia tolerance or whether it reflects a response to accumulating damage in DC fish. Reoxygenation following severe hypoxia causes oxidative stress in liver (Welker et al., 2012); the upregulation of HSP70 levels in DC fish may occur in response to the accumulation of oxidized proteins and any resulting cytotoxicity or expression may be upregulated to prevent such damage. Chronic studies incorporating longer DCH treatments and additional biochemical endpoints are required to clarify this ambiguity and assign causation.

#### DCH improves whole-animal oxygen regulation during hypoxia

The majority of truly hypoxia-tolerant species exploit some form of metabolic depression to conserve ATP stores (Boutilier, 2001). Although the reduction in  $\dot{M}_{O_2}$  exhibited by DC fish during successive hypoxic exposures (Fig. 3A) may not qualify as metabolic depression, it does suggest the fish are adopting a more tolerant phenotype. Animals exposed to stable, mean  $P_{O_2}$  conditions (12.4 kPa) showed some initial signs of a reduction in  $\dot{M}_{O_2}$ , but it never reached significance and did not persist for the duration of the exposure. It should also be noted that the fish were only treated for 5 days and were not fed during this time, so the observed phenotypes may not represent that of fish exposed to chronic DC

in the wild. The mean  $P_{O_2}$  exposure was not sufficiently stressful to induce changes in cortisol or HSP70 levels, implying that fluctuations in  $P_{O_2}$  triggered the phenotype change in DC fish, not the average decrease in  $P_{O_2}$ . However, this mean  $P_{O_2}$  exposure was limited because the fish within this treatment group were never exposed to sub-critical hypoxia (4.15 kPa). This would have allowed for the assessment of whether mean  $P_{O_2}$  exposure could promote protective metabolic regulation when fish encountered sub-critical hypoxia like the DC-treated fish. Therefore, if future studies include a mean  $P_{O_2}$  treatment, they should also include a treatment group in which fish would be exposed to mean  $P_{O_2}$  for the majority of the treatment regimen and then exposed to an acute hypoxia stress.

The progressive decrease in hypoxic  $\dot{M}_{O_2}$  exhibited by DC fish was also associated with a marked reduction in  $P_{crit}$  and EPHOC, further demonstrating increased hypoxia tolerance. The reduction in  $P_{crit}$  indicates that DC fish became better oxy-regulators, a response exhibited by hypoxia-tolerant fish under both chronic (Richards, 2009) and cycling hypoxia (Dan et al., 2014; Yang et al., 2013). This was in part likely facilitated by increases in hematocrit, hemoglobin (Hb) and MCHC (Fig. 5) to improve oxygen uptake and delivery, avoid hypoxemia, and minimize the need for anaerobic metabolism and the concomitant EPHOC. It is likely that Hb- $O_2$  affinity also increased, but this was not measured in the current study. Allosteric regulation of Hb through changes in red blood cell organic phosphate levels can markedly alter Hb- $O_2$  affinity over time scales relevant to this experiment (Val, 2000). Several studies have illustrated that  $P_{crit}$  correlates with the  $P_{O_2}$  at which blood is 50% saturated with  $O_2$  (i.e.  $P_{50}$ ; e.g. Mandic et al., 2009; Speers-Roesch et al., 2012), so an increase in Hb- $O_2$  affinity may underlie the observed reductions in  $P_{crit}$ . Similar hematological responses have been observed in the hypoxia-tolerant killifish (*Fundulus heteroclitus*) following long-term (28 days), but not short-term (7 days), intermittent hypoxia (Borowiec et al., 2015). Atlantic cod (*Gadus morhua*), a relatively hypoxia-sensitive species, exhibited a variety of hematological and physiological responses to chronic hypoxia acclimation (>6 weeks at 8–9 kPa), but acute hypoxia tolerance was not improved relative to normoxic control animals (Petersen and Gamperl, 2011). Routine  $\dot{M}_{O_2}$  was also significantly elevated and maximum  $\dot{M}_{O_2}$  decreased in cod exposed to these conditions (Petersen and Gamperl, 2010). Without a DC treatment of comparable duration in rainbow trout, it is impossible to determine whether the response differences noted above are species specific or whether they are associated with treatment duration. Fish in the MC treatment were not exposed to acute hypoxia at the end of the experiment, so we are unable to determine whether the mean decrease in  $P_{O_2}$  experienced by the DC-treated fish was sufficient to trigger the observed reduction in  $P_{crit}$  after 5 days. The data set is similarly unable to provide information on the potential effects of fasting on  $P_{crit}$  and EPHOC, as animals were not fed during the protocol. Regardless, our data strongly suggest that hypoxia-sensitive species such as rainbow trout have considerable capacity for plasticity in their sensitivity to environmental stress, at least over the short term, a trait that may facilitate their persistence in habitats progressively impacted by climate change.

#### **DCH promotes metabolic phenotype switching in the liver**

The phosphorylation and activation of the major regulatory AMPK subunit AMPK $\beta$  was similar across all treatments, indicating a baseline level of activation in all fish (Fig. 6A) (Carling, 2004). As a result, liver fatty acid biosynthesis was uniformly inhibited across

the treatments, as AMPK phosphorylates and inhibits ACC (Carling, 2004). Liver TAG concentrations were similar between treatment groups. As expected, AH fish increased their reliance on carbohydrate catabolism, largely exhausting their glycogen reserves and accumulating plasma lactate. This was likely initiated by the 2-fold increase in AMPK $\alpha$  activation and reduction in inhibitory Akt phosphorylation relative to DC and MC fish, responses that should promote catabolic processes such as glycogenolysis and glycolysis (Carling, 2004). The response to DCH was quite different: DC fish reduced catabolic AMPK activation, partially recovered their glycogen stores, increased plasma glucose and decreased lactate concentrations relative to AH fish. A remarkably similar response was observed in rainbow trout exposed to diel thermal cycling, where AMPK was deactivated and fuel stores recovered following multiple thermal cycles (Callaghan et al., 2016). In DC fish, the reduction in hypoxic  $\dot{M}_{O_2}$ , along with the demonstrated and presumed improvements in the  $O_2$  transport cascade, decreased reliance on anaerobic metabolism and glycogen stores during hypoxia, limited EPHOC, and thus facilitated recovery during normoxia. Given the severity of the DC exposure, it is unlikely they could recover their normal anabolic state, but these responses clearly shift the balance from catabolism to anabolism.

Interestingly, Chen et al. (2015) and Xia et al. (2017) found in mice and cancer cells that AMPK activation through the AMPK–HDAC5 pathway is critical for HIF-1 $\alpha$  activation and accumulation of HSP70. Inhibiting the AMPK–HDAC5 pathway led to reduced HIF-1 $\alpha$ /HSP70 expression/activation and survivorship, whereas prior exposure to hypoxia induced increased AMPK/HIF-1 $\alpha$ /HSP70 with reduced ischemia–reperfusion injury. Analogous data are also available in fish; in the epaulette shark (*Hemiscyllium ocellatum*), repeated hypoxia exposure, but not a single acute exposure, activates transcription of HIF-1 $\alpha$  pathway components and downstream protective pathways in a tissue-specific manner (Rytkönen et al., 2012). Therefore, the observed activation of AMPK in AH-treated fish may be required to initiate the protective upregulation of HSP70 and the suite of physiological responses that contributed to the apparent increase in hypoxia tolerance in the DC fish.

Previous work on diel cycling hypoxia in Atlantic salmon suggests that the responses observed here on isolated animals in the laboratory may translate to the population level. Remen et al. (2012) found that salmon exposed to DCH for extended periods exhibited similar patterns of change in plasma cortisol, lactate, hematocrit and MCHC, suggesting an initial stress followed by recovery. They also showed that feed intake, which was initially reduced in proportion to the severity of exposure, largely recovered after 2–3 weeks and that animals continued to grow under diel cycling conditions (Remen et al., 2012). Together, these findings reinforce the contention that hypoxia-sensitive fish such as salmonids possess considerable metabolic plasticity, which may allow them to thrive (or at least survive) in increasingly inhospitable habitats.

Protein synthesis can account for 23–42% of a fish's metabolic rate (Cassidy et al., 2018), and it is frequently downregulated under hypoxia to maintain energy homeostasis (Richards, 2009). The decrease in phosphorylation of 4E-BP1 and increase in eIF-2 $\alpha$  phosphorylation suggests that protein synthesis is shut down in the liver of AH fish (Fig. 8B,C). This was expected, as acute hypoxia exposure inhibits protein synthesis in trout hepatocytes *in vitro* (Krumshabel et al., 2000). Poly-ubiquitylation also increased in AH fish, suggesting that either ubiquitin ligases are more active or that the proteasome is less active. Protein degradation via the proteasome is energetically expensive and downregulating it may

limit ATP demand under hypoxia (Lamarre et al., 2012). This was not the case in DC animals, where the relative phosphorylation of protein synthesis effectors and poly-ubiquitylation recovered to levels similar to those of SC fish. In the short term and under stressful conditions, situation-specific reactivation of protein synthesis would allow for the production of key proteins such as HSP70 and hemoglobin to promote survival while the overall rate of protein synthesis is suppressed through Akt-mTORC<sub>1</sub> pathway (Callaghan et al., 2016).

### DCH does not alter the metabolic phenotype of the heart

In the heart, metabolic signaling markers were largely unchanged across the treatment groups, implying that metabolic organization remains relatively constant (Figs 5, 6 and 7). Rainbow trout have a well-developed coronary circulation to supply oxygenated blood to the compact myocardium and coronary flow increases with hypoxia (Cox et al., 2016). It is probable that coronary O<sub>2</sub> delivery was sufficient to prevent the compact myocardium from becoming severely hypoxic under these conditions, negating any requirement for major metabolic remodeling. Regardless, cardiac glycogen and TAG stores were reduced in AH fish and there was no evidence of recovery in DC fish. The importance of exogenous glucose and lactate as metabolic fuels for the heart is enhanced under such conditions (Driedzic and Gesser, 1994), with liver glycogen acting as a substrate.

### Conclusions

Our results clearly demonstrate that an ostensibly hypoxia-sensitive species maintains the capacity for considerable physiological and metabolic plasticity, which can facilitate the transition to a far more hypoxia-tolerant phenotype. Our previous work has illustrated analogous plasticity in Salmonidae challenged with diel thermal cycling (Callaghan et al., 2016; Tunnah et al., 2016b), including a similar transition from an initial catabolic phenotype followed by a return to an anabolic phenotype (Callaghan et al., 2016), suggesting there may be some common strategies for coping with repetitive energetic stressors. Although this study focused on relatively short-term responses in fasting fish, the findings have important implications for understanding and predicting how species will cope with increasingly variable and challenging environments. Additional work is necessary to characterize how chronic DCH combined with food availability may impact hypoxia tolerance and metabolic organization. The impacts of DCH on feeding behavior and how specific dynamic action is fueled and prioritized will likely vary between species and will be a challenging question to address. The intensifying eutrophication of freshwater systems, particularly around large urban centers (Smith, 2003), will undoubtedly increase the frequency and severity of DCH (Smith, 2003) and climate change models predict similar effects on temperatures (Caissie et al., 2014). There is also growing recognition that the response of animals to variable conditions cannot be accurately predicted based only on their response to the stable average of those conditions (Morash et al., 2018). Our current findings further underscore the necessity of incorporating environmentally relevant variability into studies examining the potential impacts of climate change on animals.

### Acknowledgements

We thank Mr Wayne Anderson for animal husbandry and Mr Neal Callaghan for insight into signal transduction mechanisms.

### Competing interests

The authors declare no competing or financial interests.

### Author contributions

Conceptualization: K.J.W., T.M.; Methodology: K.J.W., A.A.C., S.L., T.M.; Software: C.E.V.; Validation: K.J.W.; Formal analysis: K.J.W., C.E.V.; Investigation: K.J.W., A.A.C.; Resources: K.J.W., A.A.C., S.L., T.M.; Data curation: K.J.W.; Writing - original draft: K.J.W.; Writing - review & editing: K.J.W., A.A.C., C.E.V., S.L., T.M.; Visualization: K.J.W., T.M.; Supervision: S.L., T.M.; Project administration: S.L., T.M.; Funding acquisition: S.L., T.M.

### Funding

This study was funded by Natural Sciences and Engineering Research Council of Canada (NSERC) Discovery grants to T.J.M. and S.G.L., and an NSERC undergraduate student research grant to K.J.W.

### References

- Basu, N., Todgham, A. E., Ackerman, P. A., Bibeau, M. R., Nakano, K., Schulte, P. M. and Iwama, G. K. (2002). Heat shock protein genes and their functional significance in fish. *Gene* **295**, 173-183. doi:10.1016/S0378-1119(02)00687-X
- Behnke, R. J., Tomelleri, J. and Proebstel, D. S. (2002). *Trout and Salmon of North America*, 1st edn. New York Free Press.
- Bolli, R. (2001). Cardioprotective function of inducible nitric oxide synthase and role of nitric oxide in myocardial ischemia and preconditioning: an overview of a decade of research. *J. Mol. Cell. Cardiol.* **33**, 1897-1918. doi:10.1006/jmcc.2001.1462
- Borowiec, B. G., Darcy, K. L., Gillette, D. M. and Scott, G. R. (2015). Distinct physiological strategies are used to cope with constant hypoxia and intermittent hypoxia in killifish (*Fundulus heteroclitus*). *J. Exp. Biol.* **218**, 1198-1211. doi:10.1242/jeb.114579
- Boutillier, R. G. (2001). Mechanisms of cell survival in hypoxia and hypothermia. *J. Exp. Biol.* **204**, 3171-3181.
- Caissie, D., Breau, C., Hayward, J. and Cameron, P. (2013). *Water Temperature Characteristics of the Miramichi and Restigouche Rivers*. Miramichi, New Brunswick, Canada: Canadian Department of Fisheries and Oceans.
- Caissie, D., El-Jabi, N. and Turkan, N. (2014). *Stream Water Temperature Modeling Under Climate Change Scenarios B1 & A2*. Miramichi, New Brunswick, Canada: Canadian Department of Fisheries and Oceans.
- Callaghan, N. I., Tunnah, L., Currie, S. and MacCormack, T. J. (2016). Metabolic adjustments to short-term diurnal temperature fluctuation in the rainbow trout (*Oncorhynchus mykiss*). *Physiol. Biochem. Zool.* **89**, 498-510. doi:10.1086/688680
- Capaz, J. C., Tunnah, L., MacCormack, T. J., Lamarre, S. G., Sykes, A. V. and Driedzic, W. R. (2017). Hypoxic induced decrease in oxygen consumption in cuttlefish (*sepia officinalis*) is associated with minor increases in mantle octopine but no changes in markers of protein turnover. *Front. Physiol.* **8**, 344. doi:10.3389/fphys.2017.00344
- Carling, D. (2004). The AMP-activated protein kinase cascade—a unifying system for energy control. *Trends Biochem. Sci.* **29**, 18-24. doi:10.1016/j.tibs.2003.11.005
- Cassidy, A. A., Driedzic, W. R., Campos, D., Heinrichs-Caldas, W., Almeida-Val, V. M. F., Val, A. L. and Lamarre, S. G. (2018). Protein synthesis is lowered by 4EBP1 and eIF2- $\alpha$  signaling while protein degradation may be maintained in fasting, hypoxic Amazonian cichlids *Astronotus ocellatus*. *J. Exp. Biol.* **221**, jeb167601. doi:10.1242/jeb.167601
- Chabot, D., Steffensen, J. F. and Farrell, A. P. (2016). The determination of standard metabolic rate in fishes. *J. Fish Biol.* **88**, 81-121. doi:10.1111/jfb.12845
- Chen, S., Yin, C., Lao, T., Liang, D., He, D., Wang, C. and Sang, N. (2015). AMPK-HDAC5 pathway facilitates nuclear accumulation of HIF-1 $\alpha$  and functional activation of HIF-1 by deacetylating Hsp70 in the cytosol. *Cell Cycle* **14**, 2520-2536. doi:10.1080/15384101.2015.1055426
- Chen, Z.-Y., Wang, L., Asavaritkrai, P. and Noguchi, C. T. (2010). Up-regulation of erythropoietin receptor by nitric oxide mediates hypoxia preconditioning. *J. Neurosci. Res.* **88**, 3180-3188. doi:10.1002/jnr.22473
- Cox, G. K., Kennedy, G. E. and Farrell, A. P. (2016). Morphological arrangement of the coronary vasculature in a shark (*Squalus suckleyi*) and a teleost (*Oncorhynchus mykiss*). *J. Morphol.* **277**, 896-905. doi:10.1002/jmor.20543
- Culbertson, S. D. and Piedrahita, R. H. (1996). Aquaculture pond ecosystem model: temperature and dissolved oxygen prediction—mechanism and application. *Ecol. Model.* **89**, 231-258. doi:10.1016/0304-3800(95)00140-9
- Dan, X.-M., Yan, G.-J., Zhang, A.-J., Cao, Z.-D. and Fu, S.-J. (2014). Effects of stable and diel-cycling hypoxia on hypoxia tolerance, postprandial metabolic response, and growth performance in juvenile qingbo (*Spinibarbus sinensis*). *Aquaculture* **428–429**, 21-28. doi:10.1016/j.aquaculture.2014.02.025
- Das, C., Thraya, M. and Vijayan, M. M. (2018). Nongenomic cortisol signaling in fish. *Gen. Comp. Endocrinol.* **265**, 121-127. doi:10.1016/j.ygcen.2018.04.019
- Davidson, M. I. (2015). Diel-cycling hypoxia and pH impacts on juvenile summer flounder growth and survival. MSc thesis, University of Delaware. <http://udspace.udel.edu/handle/19716/17262>

- Delaney, M. A. and Klesius, P. H.** (2004). Hypoxic conditions induce Hsp70 production in blood, brain and head kidney of juvenile Nile tilapia *Oreochromis niloticus* (L.). *Aquaculture* **236**, 633–644. doi:10.1016/j.aquaculture.2004.02.025
- Driedzic, W. R. and Gesser, H.** (1994). Energy metabolism and contractility in ectothermic vertebrate hearts: hypoxia, acidosis, and low temperature. *Physiol. Rev.* **74**, 221–258. doi:10.1152/physrev.1994.74.1.221
- Duncan, E., Kleinman, P. J. and Sharpley, A. N.** (2012). *Eutrophication of Lakes and Rivers*, pp. 1–8. John Wiley & Sons. doi:10.1002/9780470015902.a0003249.pub2
- Gamperl, A. K., Todgham, A. E., Parkhouse, W. S., Dill, R. and Farrell, A. P.** (2001). Recovery of trout myocardial function following anoxia: preconditioning in a non-mammalian model. *Am. J. Physiol. Regul. Integr. Comp. Physiol.* **281**, 1755–1763. doi:10.1152/ajpregu.2001.281.6.R1755
- Gamperl, A. K., Faust, H. A., Dougher, B. and Rodnick, K. J.** (2004). Hypoxia tolerance and preconditioning are not additive in the trout (*Oncorhynchus mykiss*) heart. *J. Exp. Biol.* **207**, 2497–2505. doi:10.1242/jeb.01055
- Henson, S. A., Beaulieu, C., Ilyina, T., John, J. G., Long, M., Séférian, R., Tjiputra, J. and Sarmiento, J. L.** (2017). Rapid emergence of climate change in environmental drivers of marine ecosystems. *Nat. Commun.* **7**, 1–9. doi:10.1038/ncomms14682
- Justic, D., Rose, K. A., Hetland, R. D. and Fennel, K.** (2017). *Modeling Coastal Hypoxia: Numerical Simulations of Patterns, Controls and Effects of Dissolved Oxygen Dynamics*, 1st edn. Springer.
- Krumschnabel, G., Biasi, C. and Wieser, W.** (2000). Action of adenosine on energetics, protein synthesis and K<sup>+</sup> homeostasis in teleost hepatocytes. *J. Exp. Biol.* **203**, 2657–2665.
- Lamarre, S. G., Ditlecadet, D., McKenzie, D. J., Bonnaud, L. and Driedzic, W. R.** (2012). Mechanisms of protein degradation in mantle muscle and proposed gill remodeling in starved *Sepia officinalis*. *Am. J. Physiol. Regul. Integr. Comp. Physiol.* **303**, 427–437. doi:10.1152/ajpregu.00077.2012
- Lamarre, S. G., MacCormack, T. J., Sykes, A. V., Hall, J. R., Speers-Roesch, B., Callaghan, N. I. and Driedzic, W. R.** (2016). Metabolic rate and rates of protein turnover in food-deprived cuttlefish, *Sepia officinalis* (Linnaeus 1758). *Am. J. Physiol. Regul. Integr. Comp. Physiol.* **310**, 1160–1168. doi:10.1152/ajpregu.00459.2015
- Lykkeboe, G. and Weber, R. E.** (1978). Changes in the respiratory properties of the blood in the carp, *Cyprinus carpio*, induced by diurnal variation in ambient oxygen tension. *J. Comp. Physiol.* **128**, 117–125. doi:10.1007/BF00689475
- MacCormack, T. J., McKinley, R. S., Roubach, R., Almeida-Val, V. M. F., Val, A. L. and Driedzic, W. R.** (2003). Changes in ventilation, metabolism, and behaviour, but not bradycardia, contribute to hypoxia survival in two species of Amazonian armoured catfish. *Can. J. Zool.* **81**, 272–280. doi:10.1139/z03-003
- Manchenkov, T., Pasillas, M. P., Haddad, G. G. and Imam, F. B.** (2015). Novel genes critical for hypoxic preconditioning in zebrafish are regulators of insulin and glucose metabolism. *G3 Genes Genomes Genet.* **5**, 1107–1116. doi:10.1534/g3.115.018010
- Mandic, M., Todgham, A. E. and Richards, J. G.** (2009). Mechanisms and evolution of hypoxia tolerance in fish. *Proc. R. Soc. B Biol. Sci.* **276**, 735–744. doi:10.1098/rspb.2008.1235
- Methling, C., Aluru, N., Vijayan, M. M. and Steffensen, J. F.** (2010). Effect of moderate hypoxia at three acclimation temperatures on stress responses in Atlantic cod with different haemoglobin types. *Comp. Biochem. Physiol. A. Mol. Integr. Physiol.* **156**, 485–490. doi:10.1016/j.cbpa.2010.04.006
- Mommsen, T. P., Vijayan, M. M. and Moon, T. W.** (1999). Cortisol in teleosts: dynamics, mechanisms of action, and metabolic regulation. *Rev. Fish Biol. Fish.* **9**, 211–268. doi:10.1023/A:1008924418720
- Morash, A. J., Neufeld, C., MacCormack, T. J. and Currie, S.** (2018). The importance of incorporating natural thermal variation when evaluating physiological performance in wild species. *J. Exp. Biol.* **221**, 1–8. doi:10.1242/jeb.164673
- Nilsson, G. E. and Renshaw, G. M. C.** (2004). Hypoxic survival strategies in two fishes: extreme anoxia tolerance in the North European crucian carp and natural hypoxic preconditioning in a coral-reef shark. *J. Exp. Biol.* **207**, 3131–3139. doi:10.1242/jeb.00979
- Petersen, L. H. and Gamperl, A. K.** (2010). Effect of acute and chronic hypoxia on the swimming performance, metabolic capacity and cardiac function of Atlantic cod (*Gadus morhua*). *J. Exp. Biol.* **213**, 808–819. doi:10.1242/jeb.033746
- Petersen, L. H. and Gamperl, A. K.** (2011). Cod (*Gadus morhua*) cardiorespiratory physiology and hypoxia tolerance following acclimation to low-oxygen conditions. *Physiol. Biochem. Zool.* **PBZ 84**, 18–31. doi:10.1086/657286
- Poon, W. L., Hung, C. Y., Nakano, K. and Randall, D. J.** (2007). An in vivo study of common carp (*Cyprinus carpio* L.) liver during prolonged hypoxia. *Comp. Biochem. Physiol. Part D Genomics Proteomics* **2**, 295–302. doi:10.1016/j.cbd.2007.05.002
- Remen, M., Oppedal, F., Torgersen, T., Imsland, A. K. and Olsen, R. E.** (2012). Effects of cyclic environmental hypoxia on physiology and feed intake of post-smolt Atlantic salmon: Initial responses and acclimation. *Aquaculture* **326**, 148–155. doi:10.1016/j.aquaculture.2011.11.036
- Richards, J. G.** (2009). Metabolic and molecular responses of fish to hypoxia. In *Fish Physiology* (ed. J. G. Richards, A. P. Farrell and C. J. Brauner), pp. 443–485. Academic Press.
- Richards, J. G.** (2011). Physiological, behavioral and biochemical adaptations of intertidal fishes to hypoxia. *J. Exp. Biol.* **214**, 191–199. doi:10.1242/jeb.047951
- Richardson, K. and Jørgensen, B. B.** (1996). Eutrophication: definition, history and effects. In *Eutrophication in Coastal Marine Ecosystems* (ed. B. B. Jørgensen and K. Richardson), pp. 1–19. American Geophysical Union.
- Rytkönen, K. T., Renshaw, G. M. C., Vainio, P. P., Ashton, K. J., Williams-Pritchard, G., Leder, E. H. and Nikinmaa, M.** (2012). Transcriptional responses to hypoxia are enhanced by recurrent hypoxia (hypoxic preconditioning) in the epaulette shark. *Physiol. Genomics* **44**, 1090–1097. doi:10.1152/physiolgenomics.00081.2012
- Sheldon, R. A., Lee, C. L., Jiang, X., Knox, R. N. and Ferrero, D. M.** (2014). Hypoxic preconditioning protection is eliminated in HIF-1 $\alpha$  knockout mice subjected to neonatal hypoxia–ischemia. *Pediatr. Res.* **76**, 46–53. doi:10.1038/pr.2014.53
- Smith, V. H.** (2003). Eutrophication of freshwater and coastal marine ecosystems: a global problem. *Environ. Sci. Pollut. Res. Int.* **10**, 126–139. doi:10.1065/espr2002.12.142
- Speers-Roesch, B., Richards, J. G., Brauner, C. J., Farrell, A. P., Hickey, A. J. R., Wang, Y. S. and Renshaw, G. M. C.** (2012). Hypoxia tolerance in elasmobranchs. I. Critical oxygen tension as a measure of blood oxygen transport during hypoxia exposure. *J. Exp. Biol.* **215**, 93–102. doi:10.1242/jeb.059642
- Stocker, T., Qin, D., Plattner, G. K., Tignor, M., Allen, S. K., Boschung, J., Nauels, A., Xia, Y., Bex, V. and Midgley, P. M.** (2013). *Climate Change 2013: The Physical Science Basis*. Contribution of Working Group I to the Fifth Assessment Report of the Intergovernmental Panel on Climate Change. Intergovernmental Panel on Climate Change 2013.
- Tunnah, L., Mackellar, S. R. C., Barnett, D. A., MacCormack, T. J., Stehfest, K. M., Morash, A. J., Semmens, J. M. and Currie, S.** (2016a). Physiological responses to hypersalinity correspond to nursery ground usage in two inshore shark species (*Mustelus antarcticus* & *Galeorhinus galeus*). *J. Exp. Biol.* **219**, 2028–2038. doi:10.1242/jeb.139964
- Tunnah, L., Currie, S. and MacCormack, T. J.** (2016b). Do prior diel thermal cycles influence the physiological response of Atlantic salmon (*Salmo salar*) to subsequent heat stress? *Can. J. Fish. Aquat. Sci.* **74**, 127–139. doi:10.1139/cjfas-2016-0157
- Tyler, R. M., Brady, D. C. and Targett, T. E.** (2009). Temporal and spatial dynamics of diel-cycling hypoxia in estuarine tributaries. *Estuaries Coasts* **32**, 123–145. doi:10.1007/s12237-008-9108-x
- Val, A. L.** (2000). Organic phosphates in the red blood cells of fish. *Comp. Biochem. Physiol. A. Mol. Integr. Physiol.* **125**, 417–435. doi:10.1016/S1095-6433(00)00184-7
- Vijayan, M. M. and Leatherland, J. F.** (1990). High stocking density affects cortisol secretion and tissue distribution in brook charr, *Salvelinus fontinalis*. *J. Endocrinol.* **124**, 311–318. doi:10.1677/joe.0.1240311
- Ward, H. and Post, J.** (2014). *Assessment and Status Report on the Rainbow Trout (*Oncorhynchus mykiss*) in Canada-Endangered Species List 2014*. Committee on the Status of Endangered Wildlife in Canada.
- Welker, A. F., Campos, E. G., Cardoso, L. A. and Hermes-Lima, M.** (2012). Role of catalase on the hypoxia/reoxygenation stress in the hypoxia-tolerant Nile tilapia. *Am. J. Physiol. Regul. Integr. Comp. Physiol.* **302**, 1111–1118. doi:10.1152/ajpregu.00243.2011
- Wood, S. N.** (2011). Fast stable restricted maximum likelihood and marginal likelihood estimation of semiparametric generalized linear models. *J. R. Stat. Soc. Ser. B Stat. Methodol.* **73**, 3–36. doi:10.1111/j.1467-9868.2010.00749.x
- Xia, M., Ding, Q., Zhang, Z. and Feng, Q.** (2017). Remote limb ischemic preconditioning protects rats against cerebral ischemia via HIF-1 $\alpha$ /AMPK/HSP70 pathway. *Cell. Mol. Neurobiol.* **37**, 1105–1114. doi:10.1007/s10571-016-0444-2
- Xiao, W.** (2015). The hypoxia signaling pathway and hypoxic adaptation in fishes. *Sci. China Life Sci.* **58**, 148–155. doi:10.1007/s11427-015-4801-z
- Yang, H., Cao, Z.-D. and Fu, S.-J.** (2013). The effects of diel-cycling hypoxia acclimation on the hypoxia tolerance, swimming capacity and growth performance of southern catfish (*Silurus meridionalis*). *Comp. Biochem. Physiol. A. Mol. Integr. Physiol.* **165**, 131–138. doi:10.1016/j.cbpa.2013.02.028
- Yeager, D. P. and Ultsch, G. R.** (1989). Physiological regulation and conformation: a basic program for the determination of critical points. *Physiol. Zool.* **62**, 888–907. doi:10.1086/physzool.62.4.30157935
